# Supplementary material
Source: PubMed Central journal article supplement (PMC2830115)
Supplement: NIHMS28651-supplement-Supp1.pdf [file NIHMS28651-supplement-Supp1.pdf]

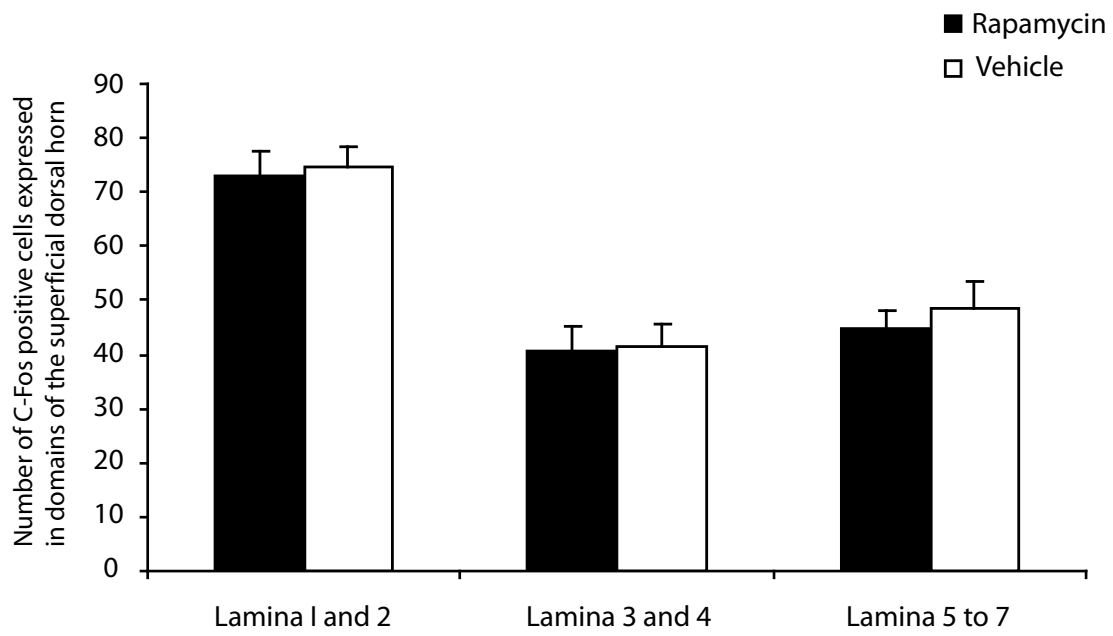

**Fig. S1. Intrathecal administration of rapamycin does not reduce the number of capsaicin induced Fos-IR neurons in the dorsal horn.** Effects of capsaicin injection in the hindpaw following intrathecal administration of rapamycin (or vehicle). There was no difference between rapamycin and vehicle pretreated animals in capsaicin induced c-Fos-IR neurons in any of the three ipsilateral domains studied. N=7 in each group.

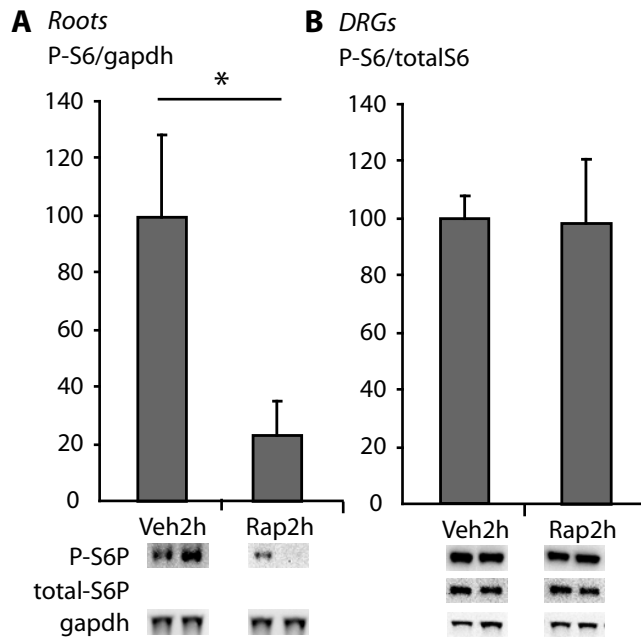

**Fig. S2. Intrathecal administration of rapamycin decreases phosphorylation of the downstream target of mTORC1 S6 protein (S6) in the dorsal roots, but not in the DRGs.** Immunoblots probed with anti-P-S6 antibody and anti-S6 antibody after gel electrophoresis of lysates from *A*, dorsal roots and *B*, L4-L6 DRGs. Animals received an intrathecal injection of rapamycin or vehicle 2 h before sacrifice. There was a significant reduction in S6 phosphorylation 2 h after rapamycin injection in the roots but not in the DRGs. N=3-4 in each condition. Mean  $\pm$  SEM is illustrated. \*  $P < 0.05$ .

*Spinal cord*

P-4EBP/total4EBP

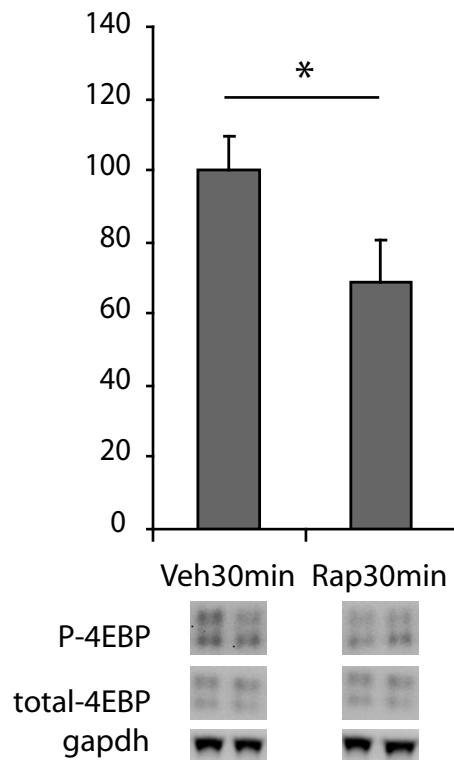

**Fig. S3. Intrathecal administration of rapamycin decreases phosphorylation of 4E-BP1/2 in the spinal cord.** Immunoblots probed with anti-P-4E-BP1/2 antibody after gel electrophoresis of lysates from spinal cord tissue. Animals received an intrathecal injection of rapamycin or vehicle 30 min before sacrifice. There was a significant reduction in 4E-BP1/2 phosphorylation 30 min after rapamycin injection in spinal cord tissue. N=3-4 in each condition. Mean  $\pm$  SEM is illustrated. \*  $P < 0.05$ .

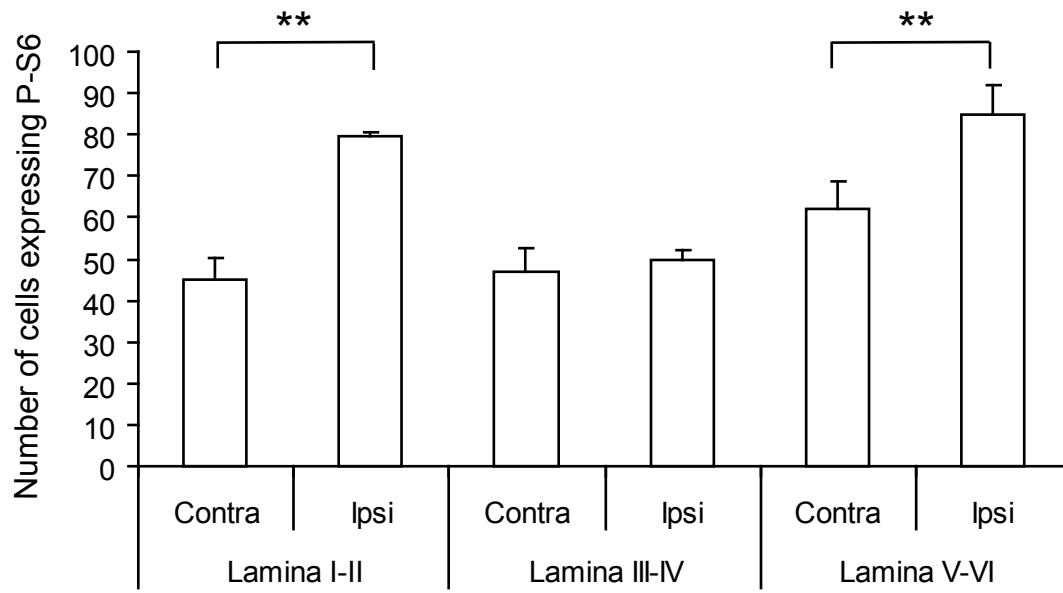

**Fig. S4. Injection of capsaicin in the hindpaw increases the phosphorylation of S6 protein in the superficial dorsal horn.** 2 h following capsaicin injection in the hindpaw, there was a significant increase in the number of cells expressing P-S6 in Lamina I and Lamina V to VI. Mean  $\pm$  SEM is illustrated. \*\*  $P < 0.01$ . N=4 in each group.



**A** *Roots*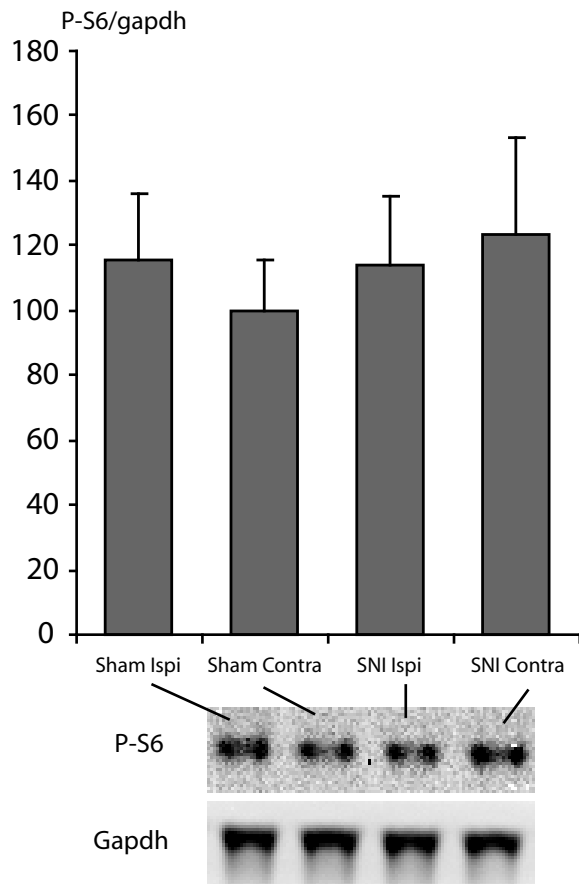**B** *Spinal cord*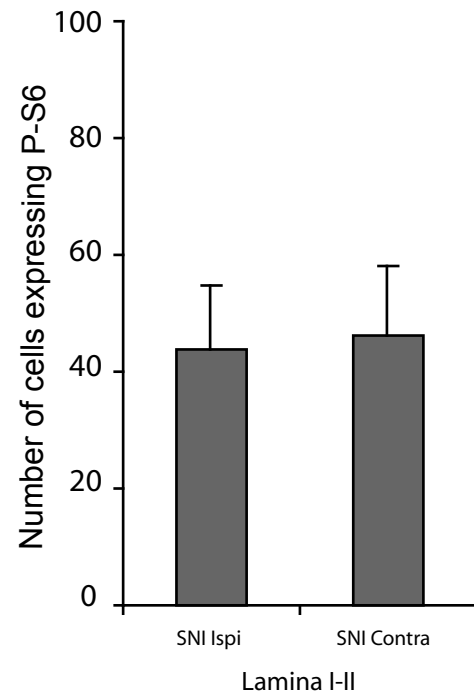**C** *Spinal cord*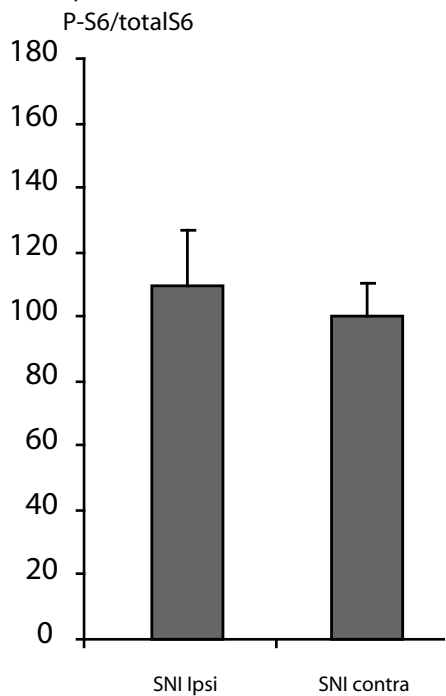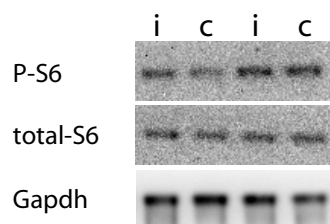

**Fig. S5. SNI surgery does not increase the phosphorylation of S6 protein in the dorsal roots and superficial dorsal horn.** 7 days after SNI surgery, there was no difference in: *A/* the expression level of P-S6 in central roots, when compared to both sham and contralateral side (western blot analysis; data normalized to sham contra group; N = 4 in each group); *B/* the number of P-S6 expressing cells in the superficial dorsal horn of the spinal cord (specifically Lamina I-II; immunohistochemistry analysis; N = 3); *C/* the expression level of P-S6 in the ipsilateral dorsal horn when compared to the contralateral side (western blot analysis; N = 6). Mean  $\pm$  SEM is illustrated.

## Ipsilateral to SNI surgery

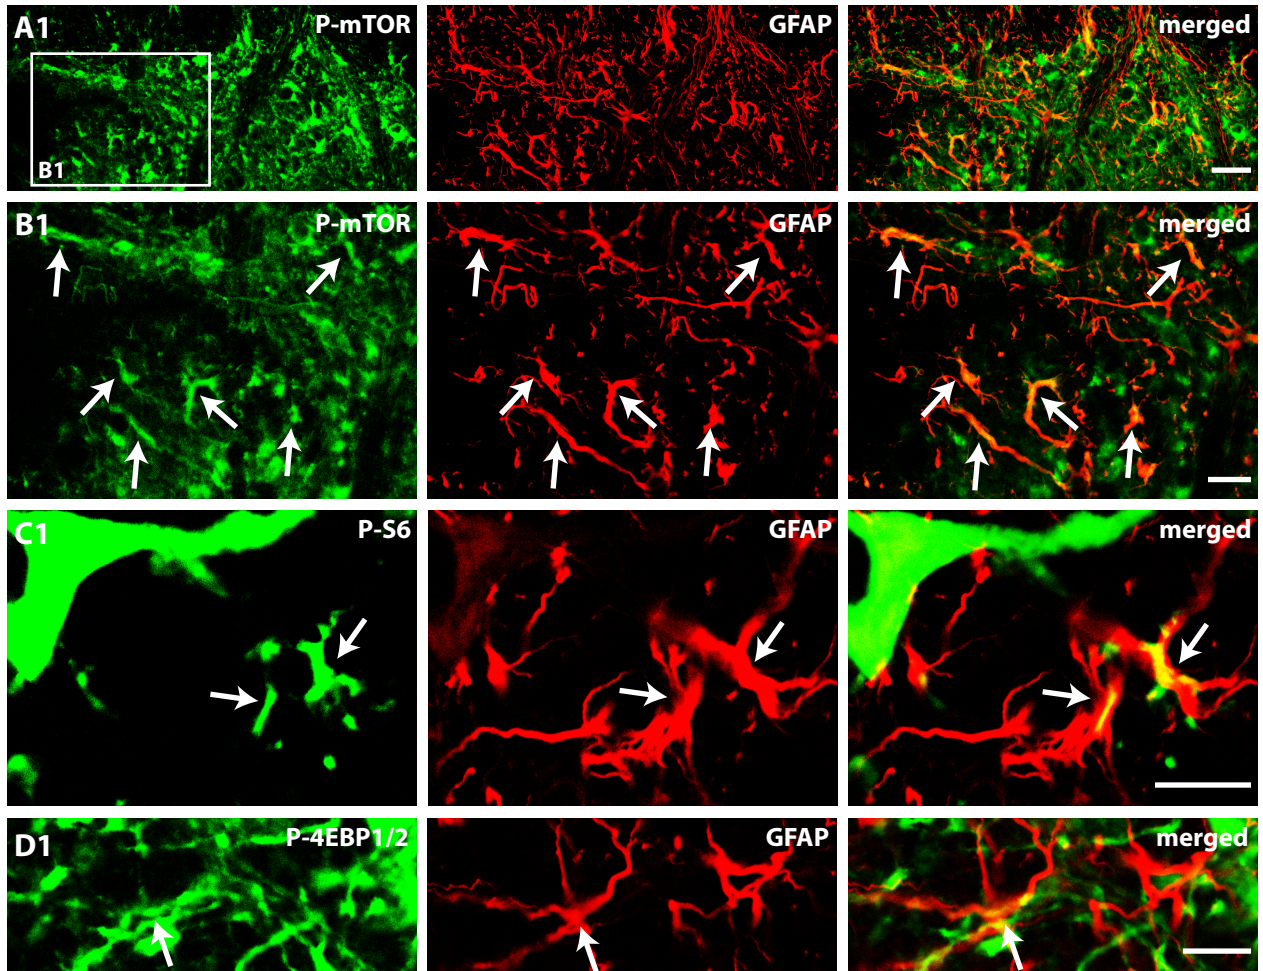

## Contralateral to SNI surgery

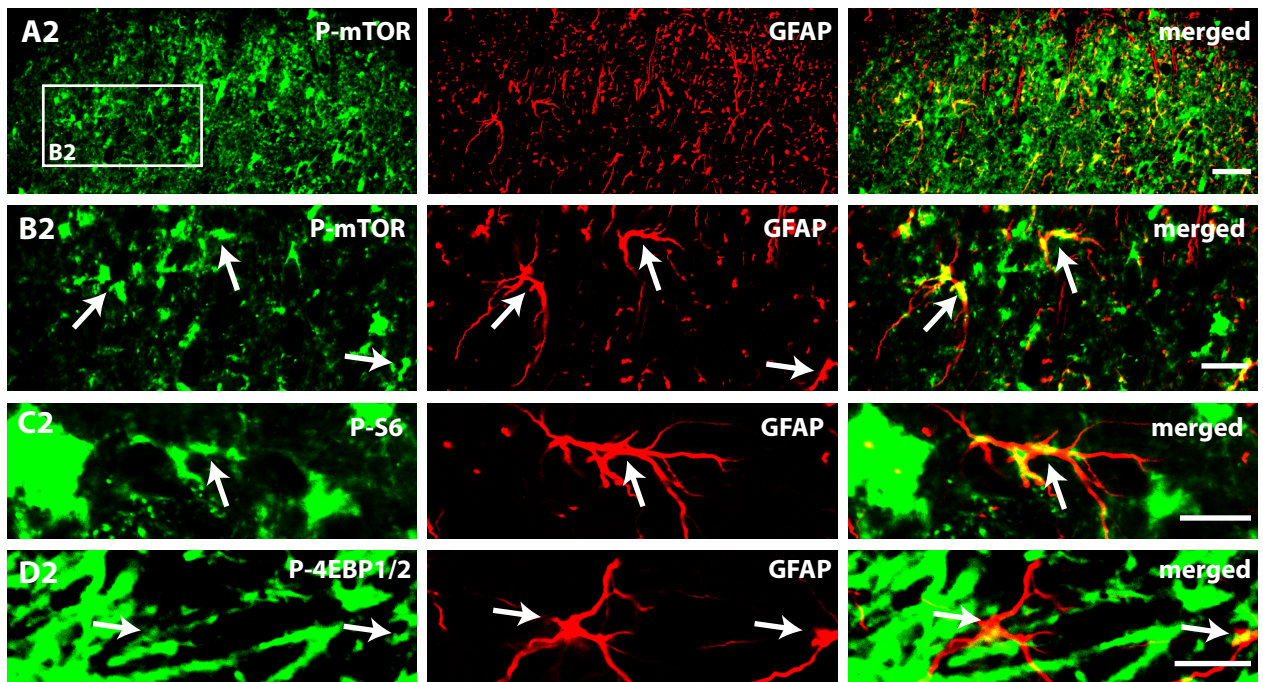

**Fig. S6. P-mTOR, P-S6 and P-4EBP1/2 are expressed in astrocytes.** 7 days after SNI surgery, animals were perfused and spinal cord tissue was cut in 40  $\mu\text{m}$  sections and stained for P-mTOR, P-S6 or P-4EBP1/2, followed by GFAP (1:4000 O/N, Dako, Denmark). P-mTOR, P-S6 and P-4EBP1/2 were expressed in astrocytes both on the ipsilateral and the contralateral side of surgery. There was no evidence for increased glial expression of these translational markers 7 days following SNI surgery. Scale bars, *A1,2*: 100  $\mu\text{m}$ ; *B1,2-D1,2*: 50  $\mu\text{m}$ .
